# Supplementary material
Source: PubMed Central journal article supplement (PMC208747)

### PHOSPHATE BUFFER

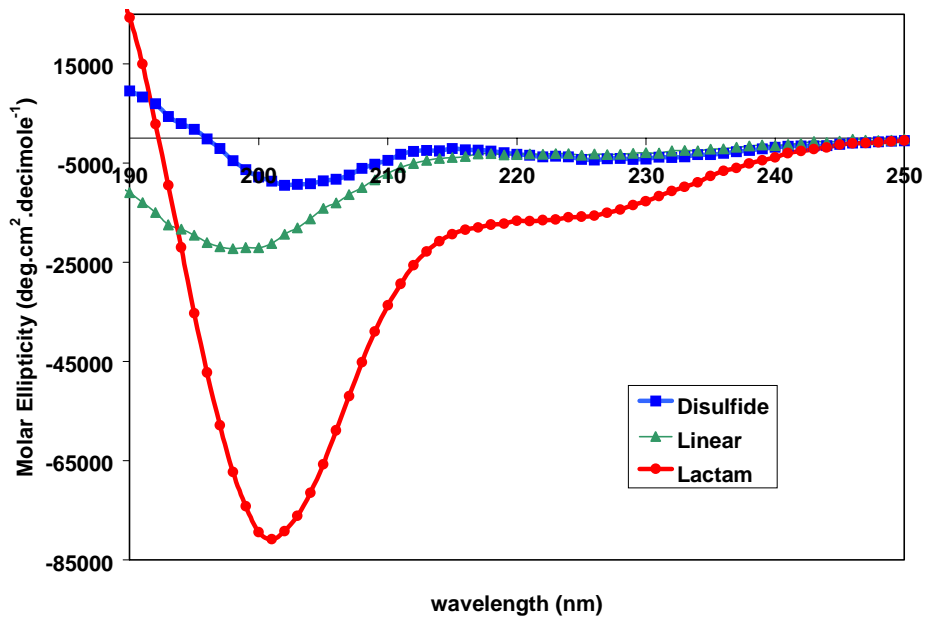

### 7% TFE

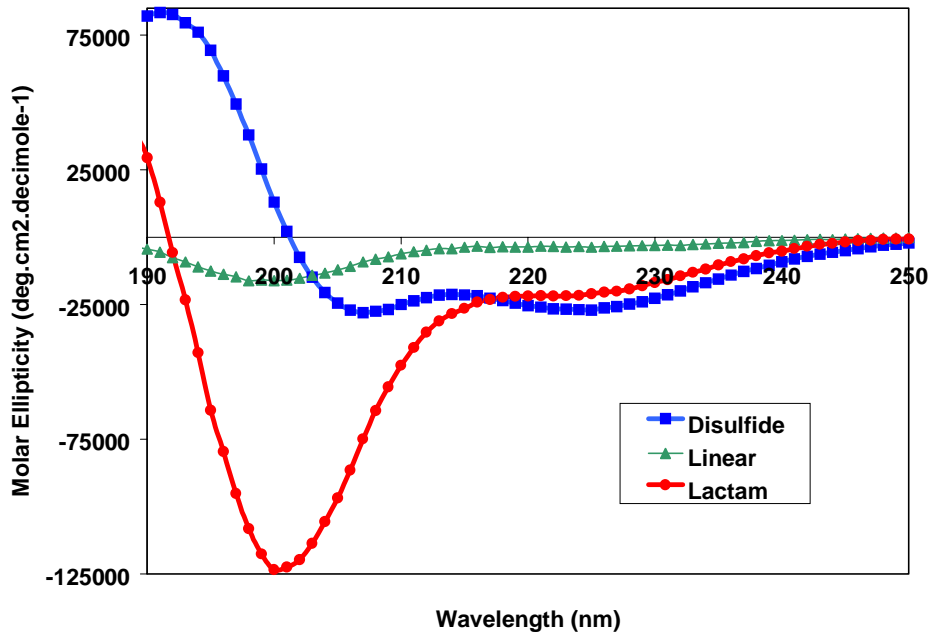

Supplement: pnas_100_20_11273__5.pdf [file pnas_100_20_11273__5.pdf]
